# Supplementary material
Source: PubMed Central journal article supplement (PMC4523403)
Supplement: NIHMS674643-supplement-Supp_TableS1-S3.pdf [file NIHMS674643-supplement-Supp_TableS1-S3.pdf]

## **Supporting Information Tables S1-S3**

### ***New Phytologist* Supporting Information**

Article title: Belowground abiotic and biotic heterogeneity shapes aboveground infection outcomes and spatial divergence in a host-parasite interaction

Authors: Tack AJM, Laine A-LL, Burdon JJ, Bissett A, Thrall PH

The following Supporting Information is available for this article:

1 **Table S1.** Methods and units for quantification of the soil structure and chemistry. Samples  
 2 were analysed by Incitec Pivot Ltd, Southbank, Australia  
 3 (<http://www.incitecpivotfertilisers.com.au/Soil%20Plant%20Tests/Nutrient%20Advantage>)  
 4

| <b>Measurement</b>            | <b>Method</b>         | <b>Unit</b> |
|-------------------------------|-----------------------|-------------|
| pH                            | 1:5 CaCl <sub>2</sub> |             |
| Electric conductivity<br>(EC) | Sat Ext               | dS/m        |
| Organic carbon (OC)           |                       | %           |
| Soil texture                  |                       |             |
| Nitrate nitrogen              | NO <sub>3</sub>       | mg/kg       |
| Phosphorus                    | Colwell               | mg/kg       |
| Potassium                     | Amm-acet              | Meq/100g    |
| Calcium                       | Amm-acet              | Meq/100g    |
| Magnesium                     | Amm-acet              | Meq/100g    |
| Sodium                        | Amm-acet              | Meq/100g    |
| Aluminium                     | KCl                   | mg/kg       |
| Chloride                      |                       | mg/kg       |
| Copper                        | DTPA                  | mg/kg       |
| Iron                          | DTPA                  | mg/kg       |
| Manganese                     | DTPA                  | mg/kg       |
| Zinc                          | DTPA                  | mg/kg       |
| Sulfate                       | KCl40                 | mg/kg       |

5

**Table S2.** Experimental inoculation matrix. Shown are the number of inoculations for combinations of plant lines (rows) and pathogen strains (columns). Due to restricted seed availability, we subdivided plant lines and pathogen strains in three blocks (which can be identified by background colour). Selected plant-pathogen combinations were tested in four environmental conditions based on moisture ('low', 'high') and soil biota ('bog type', 'hill type'). Seeds were missing or did not germinate for 44 plants, and an additional three plants died during the experiment; further deviations from the original design are due to seed limitation. Plant lines and pathogen strains from the hill ecotype are shown in italic font.

|                    | <i>CBL HILL-3</i> | G2-6 | G3-9 | P1-6 | <i>SH2-4</i> | CBL BOG-2 | CEM-3 | CBL BOG-1 | <i>CBL HILL-10</i> | G2-8 | P1-9 | CEM-5 | G3-4 | <i>SH2-7</i> | CBL BOG-6 | G2-2 | G3-8 | P1-3 | <i>SH2-10</i> | <i>CBL HILL-4</i> | CEM-7 |
|--------------------|-------------------|------|------|------|--------------|-----------|-------|-----------|--------------------|------|------|-------|------|--------------|-----------|------|------|------|---------------|-------------------|-------|
| CBL BOG-3          | 4                 | 4    | 4    | 4    | 4            | 4         | 4     | 0         | 0                  | 0    | 0    | 0     | 0    | 0            | 0         | 0    | 0    | 0    | 0             | 0                 | 0     |
| <i>CBL HILL-4</i>  | 4                 | 4    | 4    | 4    | 4            | 4         | 4     | 0         | 0                  | 0    | 0    | 0     | 0    | 0            | 0         | 0    | 0    | 0    | 0             | 0                 | 0     |
| CEM-5              | 4                 | 4    | 4    | 4    | 4            | 4         | 4     | 0         | 0                  | 0    | 0    | 0     | 0    | 0            | 0         | 0    | 0    | 0    | 0             | 0                 | 0     |
| G2-3               | 4                 | 4    | 4    | 4    | 4            | 4         | 4     | 0         | 0                  | 0    | 0    | 0     | 0    | 0            | 0         | 0    | 0    | 0    | 0             | 0                 | 0     |
| P1-7               | 4                 | 4    | 4    | 4    | 4            | 4         | 4     | 0         | 0                  | 0    | 0    | 0     | 0    | 0            | 0         | 0    | 0    | 0    | 0             | 0                 | 0     |
| <i>SH2-5</i>       | 4                 | 4    | 4    | 4    | 4            | 4         | 4     | 0         | 0                  | 0    | 0    | 0     | 0    | 0            | 0         | 0    | 0    | 0    | 0             | 0                 | 0     |
| G3-2               | 4                 | 4    | 4    | 4    | 4            | 0         | 0     | 0         | 0                  | 0    | 0    | 0     | 0    | 0            | 0         | 0    | 0    | 0    | 0             | 0                 | 0     |
| G2-5               | 0                 | 0    | 0    | 0    | 0            | 0         | 0     | 4         | 4                  | 4    | 4    | 4     | 4    | 4            | 4         | 4    | 4    | 4    | 4             | 4                 | 4     |
| CBL BOG-4          | 0                 | 0    | 0    | 0    | 0            | 0         | 0     | 4         | 4                  | 4    | 4    | 4     | 4    | 4            | 0         | 0    | 0    | 0    | 0             | 0                 | 0     |
| <i>CBL HILL-10</i> | 0                 | 0    | 0    | 0    | 0            | 0         | 0     | 4         | 4                  | 4    | 4    | 4     | 4    | 4            | 0         | 0    | 0    | 0    | 0             | 0                 | 0     |
| CEM-10             | 0                 | 0    | 0    | 0    | 0            | 0         | 0     | 4         | 4                  | 4    | 4    | 4     | 4    | 4            | 0         | 0    | 0    | 0    | 0             | 0                 | 0     |
| G3-5               | 0                 | 0    | 0    | 0    | 0            | 0         | 0     | 4         | 4                  | 4    | 4    | 4     | 4    | 4            | 0         | 0    | 0    | 0    | 0             | 0                 | 0     |
| <i>SH2-9</i>       | 0                 | 0    | 0    | 0    | 0            | 0         | 0     | 4         | 4                  | 4    | 4    | 4     | 4    | 4            | 0         | 0    | 0    | 0    | 0             | 0                 | 0     |
| P1-2               | 0                 | 0    | 0    | 0    | 0            | 0         | 0     | 4         | 4                  | 4    | 4    | 0     | 0    | 0            | 0         | 0    | 0    | 0    | 0             | 0                 | 0     |
| CBL BOG-6          | 0                 | 0    | 0    | 0    | 0            | 0         | 0     | 0         | 0                  | 0    | 0    | 0     | 0    | 0            | 4         | 4    | 4    | 4    | 4             | 4                 | 4     |
| <i>CBL HILL-7</i>  | 0                 | 0    | 0    | 0    | 0            | 0         | 0     | 0         | 0                  | 0    | 0    | 0     | 0    | 0            | 4         | 4    | 4    | 4    | 4             | 4                 | 4     |
| CEM-4              | 0                 | 0    | 0    | 0    | 0            | 0         | 0     | 0         | 0                  | 0    | 0    | 0     | 0    | 0            | 4         | 4    | 4    | 4    | 4             | 4                 | 4     |
| G3-1               | 0                 | 0    | 0    | 0    | 0            | 0         | 0     | 0         | 0                  | 0    | 0    | 0     | 0    | 0            | 4         | 4    | 4    | 4    | 4             | 4                 | 3     |
| <i>SH2-4</i>       | 0                 | 0    | 0    | 0    | 0            | 0         | 0     | 0         | 0                  | 0    | 0    | 0     | 0    | 0            | 4         | 4    | 4    | 4    | 4             | 3                 | 3     |
| P1-8               | 0                 | 0    | 0    | 0    | 0            | 0         | 0     | 0         | 0                  | 0    | 0    | 0     | 0    | 0            | 4         | 0    | 0    | 0    | 0             | 0                 | 0     |
